# Supplementary material for: N-Acetylated amino sugars: the dependence of NMR 3J(HNH2)-couplings on conformation, dynamics and solvent
Source: Royal Society of Chemistry journal article supplement (doi:10.1039/b705761j), 2007-01-01
Supplement: b705761j.pdf [file b705761j.pdf]

Supplementary Table 1

Calculated energies (B3LYP/6-31G\*\*), relative populations (T=298K) and calculated coupling constants (FC-contribution only, see methods) of GlcNAc, together with the weighted average coupling constant.

| Dihedral Angle [°] | Energy [Hartrees] | GlcNAc $\alpha$ |               | GlcNAc $\alpha$ [PCM] |      |               | GlcNAc $\beta$    |      |               |
|--------------------|-------------------|-----------------|---------------|-----------------------|------|---------------|-------------------|------|---------------|
|                    |                   | %Pop            | $J$ (FC-only) | Energy [Hartrees]     | %Pop | $J$ (FC-only) | Energy [Hartrees] | %Pop | $J$ (FC-only) |
| 0                  | -819.9921         | 16%             | 8.17          | -820.0285             | 0%   | 8.17          | -819.9867         | 0%   | 7.72          |
| 30                 | -819.9927         | 33%             | 7.08          | -820.0350             | 92%  | 7.08          | -819.9841         | 0%   | 6.57          |
| 60                 | -819.9930         | 43%             | 2.37          | -820.0325             | 6%   | 2.37          | -819.9797         | 0%   | 3.09          |
| 90                 | -819.9902         | 2%              | 0.26          | -820.0269             | 0%   | 0.26          | -819.9863         | 0%   | 0.35          |
| 120                | -819.9903         | 3%              | 3.22          | -820.0291             | 0%   | 3.22          | -819.9764         | 0%   | 4.45          |
| 150                | -819.9896         | 1%              | 8.71          | -820.0302             | 1%   | 8.71          | -819.9819         | 0%   | 9.89          |
| 180                | -819.9898         | 2%              | 11.90         | -820.0310             | 1%   | 11.90         | -819.9850         | 0%   | 12.47         |
| 210                | -819.9880         | 0%              | 9.81          | -819.9880             | 0%   | 9.81          | -819.9919         | 0%   | 8.92          |
| 240                | -819.9822         | 0%              | 4.75          | -820.0246             | 0%   | 4.75          | -819.9941         | 4%   | 3.57          |
| 270                | -819.9731         | 0%              | 0.59          | -820.0162             | 0%   | 0.59          | -819.9967         | 58%  | 0.43          |
| 300                | -819.9768         | 0%              | 2.51          | -820.0272             | 0%   | 2.51          | -819.9963         | 38%  | 1.62          |
| 330                | -819.9791         | 0%              | 6.45          | -820.0296             | 0%   | 6.45          | -819.9915         | 0%   | 5.20          |
| Average $J$        |                   |                 | 5.09          |                       |      | 7.29          |                   |      | 1.04          |
